# Supplementary material
Source: MDPI journal article supplement (https://www.mdpi.com/2076-3417/14/2/583)
Supplement: s1 [file s1]

## Supplementary Material

**Table S1.** Questionnaires with German translations of each item.

| Scale                             | Item                                                                                                                                                                     | Source                                                                                                                             |
|-----------------------------------|--------------------------------------------------------------------------------------------------------------------------------------------------------------------------|------------------------------------------------------------------------------------------------------------------------------------|
| Sensory and Imaginative Immersion | It was aesthetically pleasing.<br><i>Es war ästhetisch ansprechend.</i>                                                                                                  | IJsselsteijn et al.: <i>The Game Experience Questionnaire</i> [8]                                                                  |
|                                   | I felt imaginative.<br><i>Ich fühlte mich fantasievoll.</i>                                                                                                              |                                                                                                                                    |
|                                   | I found it impressive.<br><i>Ich fand es beeindruckend.</i>                                                                                                              |                                                                                                                                    |
|                                   | It felt like rich experience.<br><i>Es fühlte sich an wie eine bereichernde Erfahrung.</i>                                                                               |                                                                                                                                    |
|                                   |                                                                                                                                                                          |                                                                                                                                    |
|                                   |                                                                                                                                                                          |                                                                                                                                    |
| Flow                              | I was fully occupied with the game.<br><i>Ich war vollkommen mit dem Spiel beschäftigt.</i>                                                                              | IJsselsteijn et al.: <i>The Game Experience Questionnaire</i> [8]                                                                  |
|                                   | I forgot everything around me.<br><i>Ich habe alles um mich rum vergessen.</i>                                                                                           |                                                                                                                                    |
|                                   | I lost track of time.<br><i>Ich habe das Zeitgefühl verloren.</i>                                                                                                        |                                                                                                                                    |
|                                   | I was deeply concentrated in the game.<br><i>Ich war sehr auf das Spiel konzentriert.</i>                                                                                |                                                                                                                                    |
|                                   | I lost connection with the outside world.<br><i>Ich habe die Verbindung zu Außenwelt verloren.</i>                                                                       |                                                                                                                                    |
|                                   |                                                                                                                                                                          |                                                                                                                                    |
|                                   |                                                                                                                                                                          |                                                                                                                                    |
| Avatar Identification             | When I am playing, it feels as if I am my character.<br><i>Wenn ich spiele, habe ich das Gefühl, ich bin meine Spielfigur.</i>                                           | Van Looy et al.: <i>Player Identification in Online Games: Validation of a Scale for Measuring Identification in MMORPGs.</i> [30] |
|                                   | I feel like I am inside my character when playing.<br><i>Wenn ich spiele, habe ich das Gefühl, in meiner Spielfigur drin zu sein.</i>                                    |                                                                                                                                    |
|                                   | In the game, it is as if I become one with my character.<br><i>Im Spiel ist es, als würde ich eins mit meiner Spielfigur werden.</i>                                     |                                                                                                                                    |
|                                   | When I am playing I am transported into my character.<br><i>Beim Spielen fühle ich mich in meine Spielfigur hineinversetzt.</i>                                          |                                                                                                                                    |
|                                   | When playing, it feels as if my character's body becomes my own.<br><i>Beim Spielen fühlt es sich so an, als würde der Körper meines Charakters mein eigener werden.</i> |                                                                                                                                    |
|                                   | In the game, it is as if I act directly through my character.<br><i>Im Spiel ist es so, als würde ich direkt durch meinen Charakter handeln.</i>                         |                                                                                                                                    |
|                                   | I identify with my character.<br><i>Ich identifiziere mich mit meinem Charakter.</i>                                                                                     |                                                                                                                                    |
|                                   |                                                                                                                                                                          |                                                                                                                                    |
|                                   |                                                                                                                                                                          |                                                                                                                                    |
| Competence                        | I felt skillful.<br><i>Ich fühlte mich gekonnt.</i>                                                                                                                      | IJsselsteijn et al.: <i>The Game Experience Questionnaire</i> [8]                                                                  |
|                                   | I felt competent.<br><i>Ich fühlte mich kompetent.</i>                                                                                                                   |                                                                                                                                    |
|                                   | I was good at it.<br><i>Ich war gut in dem Spiel.</i>                                                                                                                    |                                                                                                                                    |
|                                   | I felt successful.<br><i>Ich habe mich erfolgreich gefühlt.</i>                                                                                                          |                                                                                                                                    |
|                                   | I was fast at reaching the game's target.<br><i>Ich konnte schnell das Ziel des Spiels erreichen.</i>                                                                    |                                                                                                                                    |
|                                   |                                                                                                                                                                          |                                                                                                                                    |
|                                   |                                                                                                                                                                          |                                                                                                                                    |
| Fun                               | I thought it was fun. *                                                                                                                                                  | IJsselsteijn et al.: <i>The Game Experience Questionnaire</i> [8]                                                                  |
|                                   | <i>Ich fand, dass es mir Spaß gemacht hat.</i>                                                                                                                           |                                                                                                                                    |
|                                   | I felt happy.                                                                                                                                                            |                                                                                                                                    |

---

*Ich habe mich glücklich gefühlt.*

I enjoyed it.

*Ich habe es genossen.*

It gave me a bad mood. (-)

*Es hat mich in eine schlechte Stimmung versetzt.*

I felt bored. (-)

*Ich war gelangweilt.*

---

*Note.* \* identifies the sole item used to assess fun in Experiment 1. (-) identifies items which were recoded for analysis.
